1

2

3 Stable Potassium Isotopes ( $^{41}\text{K}/^{39}\text{K}$ ) Track Transcellular and Paracellular Potassium  
4 Transport in Biological Systems

5

6

7 John A. Higgins<sup>1\*</sup>, Danielle Santiago Ramos<sup>2</sup>, Stefania Gili<sup>1</sup>, Cornelia Spetea<sup>3,4</sup>, Scott  
8 Kanoski<sup>5</sup>, Darren Ha<sup>6</sup>, Alicia A. McDonough<sup>6</sup>, Jang H. Youn<sup>6</sup>

9 <sup>1</sup>Department of Geosciences, Princeton University, Princeton, USA

10 <sup>2</sup>Department of Marine and Coastal Science, Rutgers University, New Brunswick, USA

11 <sup>3</sup>Department of Biological and Environmental Sciences, University of Gothenburg,  
12 Gothenburg, Sweden

13 <sup>4</sup>Department of Molecular Biology, Princeton University, Princeton, USA

14 <sup>5</sup>Department of Human and Evolutionary Biology, University of Southern California, Los  
15 Angeles, USA

16 <sup>6</sup>Department of Physiology and Neuroscience, University of Southern California Keck  
17 School of Medicine, Los Angeles, USA

18

19 **Abstract:** Here we present measurements of the stable isotope ratios of potassium  
20 ( $^{41}\text{K}/^{39}\text{K}$ ) in three biological systems. We show that the ratio of  $^{41}\text{K}$  to  $^{39}\text{K}$  varies  
21 systematically: between the single-celled green alga *Chlamydomonas reinhardtii* and  
22 growth medium; between muscles of both euryhaline and stenohaline marine teleosts  
23 and seawater; and between blood plasma and red blood cells, muscles, cerebrospinal  
24 fluid, brain tissues, and urine in the terrestrial mammal *Rattus norvegicus*. Considered in  
25 the context of our current understanding of  $\text{K}^+$  transport in these biological systems, our  
26 results provide evidence that the fractionation of K isotopes depends on transport  
27 pathway and transmembrane transport machinery:  $\text{K}^+$  channels and paracellular  
28 transport through tight-junctions favor  $^{39}\text{K}$  whereas  $\text{K}^+$  pumps and co-transporters exhibit  
29 less isotopic fractionation. These results indicate that stable K isotopes can provide  
30 unique quantitative insights into the machinery and dynamics of  $\text{K}^+$  homeostasis in  
31 biological systems.

32

33

34

35

36

37

38

39

## 40 1. Introduction

41 As the most abundant cation in archaeal, bacterial, and eukaryotic cells,  
42 potassium ( $K^+$ ) is an essential nutrient in all biological systems. Intracellular  $K^+$ , critical  
43 for electrical excitability, protein synthesis, energy metabolism, and cell volume  
44 regulation, is maintained in eukaryotes at 120-130 mM by the active pumping of  $K^+$  from  
45 extracellular fluid (ECF) into the intracellular fluid (ICF) by plasma membrane Na,K-  
46 ATP<sub>ase</sub>. This action maintains ECF K concentration at 3.5-5 mM, establishing a steep  
47 transmembrane  $K^+$  gradient that is a key determinant of membrane potential and a  
48 source of energy to drive action potentials, control muscle contractility, and power ion  
49 transporters (1). The regulation of potassium at both the cellular and organismal level,  $K^+$   
50 homeostasis, is ultimately accomplished at the molecular level by transcellular and  
51 paracellular transporters (including ion pumps, channels, co-transporters) moving K  
52 across membranes and between cells (2-5). Pumps, channels, and co-transporters are  
53 largely conserved across the major domains of life (3, 4, 6). The shared machinery of  $K^+$   
54 transport in biological systems reflects the fundamental role of the electrochemical  
55 potential generated by biologically maintained gradients of  $K^+$  across cell membranes.  $K^+$   
56 pumps establish and maintain concentration gradients across cell membranes by  
57 moving  $K^+$  (from ECF-ICF) and Na or H (from ICF to ECF) “uphill” against their  
58 electrochemical potentials coupled to and driven by the hydrolysis of ATP. K co-  
59 transporters couple uphill K transport to “downhill” transport of another ion (e.g., Na or  
60 Cl).  $K^+$  channels provide a direct energetically favorable pathway for rapid and yet highly  
61 selective transport of  $K^+$  down its electrochemical potential. While much about the  
62 machinery of  $K^+$  homeostasis in biological systems is known many quantitative aspects  
63 remain enigmatic.(7-9)

64 In natural systems potassium is made up of two stable (potassium-39 and  
65 potassium-41) and one radioactive (potassium-40) isotope. The two stable isotopes of K,  
66  $^{39}K$  and  $^{41}K$ , constitute 93.258% and 6.730% of the total, respectively, resulting in a ratio  
67 of  $^{41}K/^{39}K$  in nature of ~0.07217. Recent advances in inductively coupled plasma mass  
68 spectrometry (ICP-MS) now permit the precise quantification of deviations from the  
69 terrestrial ratio resulting from the biogeochemical cycling of potassium in nature with a  
70 precision of 1 part in 10,000 (10-12). Here we apply this analytical tool to study  $K^+$   
71 homeostasis in three biological systems – aquatic green alga *Chlamydomonas*  
72 *reinhardtii* (*C. reinhardtii*), a suite of euryhaline and stenohaline marine teleosts, and the  
73 terrestrial mammal *Rattus norvegicus* (*R. norvegicus*). The results in each system are  
74 interpreted as reflecting  $K^+$  homeostasis under normal (optimal) growth conditions and  
75 differences between taking into account that the input ratio (standard medium or diet) is  
76 distinct from the terrestrial ratio. The data are presented using standard delta notation in  
77 parts per thousand (‰).

78

$$\delta^{41/39}\text{K} = \left( \frac{R_{\text{sample}}^{41\text{K}/39\text{K}}}{R_{\text{standard}}^{41\text{K}/39\text{K}}} - 1 \right) \cdot 10^3$$

79

80 where  $R_{\text{sample}}^{41\text{K}/39\text{K}}$  is the ratio of  $^{41}\text{K}/^{39}\text{K}$  in a sample and  $R_{\text{standard}}^{41\text{K}/39\text{K}}$  is the  $^{41}\text{K}/^{39}\text{K}$  of the  
81 standard). For plants the standard is the  $^{41}\text{K}/^{39}\text{K}$  of the growth medium, whereas for  
82 marine teleosts it is the  $^{41}\text{K}/^{39}\text{K}$  of seawater. For *R. norvegicus*, we report the data in one  
83 of two ways. To explore total body  $\text{K}^+$  homeostasis we report the  $^{41}\text{K}/^{39}\text{K}$  of  $\text{K}$  excretory  
84 losses normalized to the  $^{41}\text{K}/^{39}\text{K}$  of the diet whereas to examine the partitioning of  $\text{K}$   
85 isotopes between extracellular and intracellular compartments we report the  $^{41}\text{K}/^{39}\text{K}$  of  
86 tissues relative to the  $^{41}\text{K}/^{39}\text{K}$  of blood plasma or cerebrospinal fluid (CSF).  $\text{K}$  isotope  
87 fractionation factors are calculated as ratios of isotope ratios (e.g.  $\alpha_{\text{medium/cell}} =$   
88  $[^{41}\text{K}/^{39}\text{K}_{\text{medium}}] / [^{41}\text{K}/^{39}\text{K}_{\text{cell}}]$ ) and reported as  $\epsilon$  values (in ‰) where  $\epsilon_{\text{medium/cell}} = \alpha_{\text{medium/cell}} -$   
89 1.

## 90 2. Results

91

92 Results for the freshwater algae *C. reinhardtii*, (Figure 1) show that the  $\delta^{41}\text{K}$  value  
93 of the whole cell is  $1.2 \pm 0.07\text{‰}$  lower than the  $\delta^{41}\text{K}$  value of the growth medium (0‰ by  
94 definition) (95% confidence;  $P = 4.5 \times 10^{-5}$ ).

95 Results for white muscle tissue from a suite of stenohaline and euryhaline marine  
96 teleosts, reported relative to the  $^{41}\text{K}/^{39}\text{K}$  of seawater ( $\delta^{41}\text{K}_{\text{seawater}} = 0\text{‰}$ ) are shown in  
97 Figure 2a. The total range in muscle  $\delta^{41}\text{K}$  values is  $\sim 2\text{‰}$  ( $+1\text{‰}$  to  $-1\text{‰}$ ). Stenohaline  
98 species including *Gadus morhua* (Atlantic Cod), *Peprilus striacanthus* (Butterfish),  
99 *Xiphias gladius* (Swordfish), *Pseudopleuronectes americanus* (Winter Flounder), and  
100 *Hippoglossus stenolepis* (Pacific Halibut) are characterized by  $\delta^{41}\text{K}_{\text{seawater}}$  values that are  
101 uniformly negative whereas the euryhaline species *Oncorhynchus kisutch* (Coho  
102 Salmon), *Oncorhynchus tshawytscha* (King Salmon), and *Oncorhynchus nerka*  
103 (Sockeye Salmon) are characterized by  $\delta^{41}\text{K}_{\text{seawater}}$  values that are close to zero or  
104 positive. When species are grouped by salinity tolerance, average measured  $\delta^{41}\text{K}_{\text{seawater}}$   
105 values of the two groups are  $-0.58 \pm 0.09\text{‰}$ , and  $0.29 \pm 0.18\text{‰}$  for stenohaline and  
106 euryhaline species, respectively (95% confidence;  $P = 1.4 \times 10^{-10}$ ).

107 Results for *R. norvegicus* are shown in Figures 3-5. Measured  $\delta^{41}\text{K}$  values of  
108 both urine and feces, normalized to the  $\delta^{41}\text{K}$  value of the rat diet ( $\delta^{41}\text{K}_{\text{diet}}$ ), indicate  
109 preferential net uptake of  $^{39}\text{K}$  relative to  $^{41}\text{K}$  across the gut epithelium leading to a  
110 positive  $\delta^{41}\text{K}_{\text{diet}}$  value in feces ( $+0.19 \pm 0.09\text{‰}$ , 95% confidence;  $P = 0.037$ ; Fig. 3) and

111 slightly negative  $\delta^{41}\text{K}_{\text{diet}}$  value in urine ( $-0.09 \pm 0.10\%$ , 95% confidence;  $P = 0.1895$ ).  
112 Measurements of K isotopes of various tissues in *R. norvegicus* (except brain tissues)  
113 are normalized to the  $\delta^{41}\text{K}$  value of the blood plasma ( $\delta^{41}\text{K}_{\text{plasma}}$ ), as this represents the  
114 extracellular K concentration bathing the tissues. For brain tissues, measured  $\delta^{41}\text{K}$   
115 values are normalized to CSF ( $\delta^{41}\text{K}_{\text{CSF}}$ ) for the same reason.

116 The overall range in  $\delta^{41}\text{K}_{\text{plasma}}$  values between different tissues and fluids is  $\sim 1\%$   
117 (Fig 4,5);  $\delta^{41}\text{K}$  values of the following tissues are elevated in  $^{41}\text{K}$  relative to blood plasma  
118 (positive  $\delta^{41}\text{K}_{\text{plasma}}$  values): red blood cells ( $+0.40 \pm 0.08\%$ ,  $P = 0.005$ ), heart  
119 ( $+0.55 \pm 0.15\%$ ,  $P = 0.0047$ ), liver ( $+0.30 \pm 0.05\%$ ,  $P = 0.01$ ), and soleus muscle  
120 ( $+0.17 \pm 0.03\%$ ,  $P = 0.05$ ). Similarly, brain tissues are elevated in  $^{41}\text{K}$  relative to CSF  
121 (positive  $\delta^{41}\text{K}_{\text{CSF}}$  values): cerebrum ( $+0.34 \pm 0.15\%$ ,  $P = 0.012$ ), spinal cord  
122 ( $+0.30 \pm 0.17\%$ ,  $P = 0.026$ ), and cerebellum ( $+0.21 \pm 0.11\%$ ,  $P = 0.037$ ). In contrast, urine  
123 ( $-0.50 \pm 0.10\%$ ,  $P = 0.0019$ ) and CSF ( $-0.59 \pm 0.12\%$ ,  $P = 6.2 \times 10^{-5}$ ) are characterized by  
124 negative  $\delta^{41}\text{K}_{\text{plasma}}$  values. In another category are tissues with  $\delta^{41}\text{K}_{\text{plasma}}$  values that are  
125 statistically indistinguishable from zero including: kidneys ( $+0.07 \pm 0.07\%$ ,  $P = 0.31$ ),  
126 adipose tissue ( $+0.01 \pm 0.08\%$ ,  $P = 0.92$ ), extensor digitorum longus (EDL,  $+0.17 \pm 0.11\%$ ,  
127  $P = 0.099$ ) gastrocnemius ( $+0.01 \pm 0.15\%$ ,  $P = 0.92$ ), and tibialis anterior (TA,  
128  $+0.09 \pm 0.1\%$ ,  $P = 0.30$ ).

### 129 3. Discussion

130  
131 The shared machinery of  $\text{K}^+$  transport in biological systems suggests that the  
132 variability in stable K isotopes observed in algae, marine teleosts, and terrestrial  
133 mammals reflects the extent to which this machinery (tight junctions, channels, pumps,  
134 and co-transporters) discriminates between  $^{39}\text{K}$  and  $^{41}\text{K}$  and how that machinery is  
135 assembled into a homeostatic system. The extent to which different  $\text{K}^+$  transporters  
136 discriminate between  $^{39}\text{K}$  and  $^{41}\text{K}$  will, in turn, depend on the mechanics and selectivity  
137 of the transporter. For example, the  $\sim 25\%$  difference in ionic radius between  $\text{Na}^+$  and  $\text{K}^+$   
138 is believed to play a role in the strong selectivity of  $\text{K}^+$  channels for  $\text{K}^+$  over  $\text{Na}^+$  and  
139 Christiansen et al. (13) proposed that a size difference of  $0.0035\%$  between  $^{41}\text{K}$  and  $^{39}\text{K}$   
140 could result in a  $\sim 1\%$  K isotope effect ( $\epsilon_{\text{channel}}$ ) due to size selectivity. However,  $\text{K}^+$   
141 channels are not rigid structures and have been shown to exhibit considerable flexibility  
142 (13), suggesting that K isotopic fractionation by size selection may not be  
143 straightforward.

144 Desolvation of  $\text{K}^+$  during the binding to an active site in  $\text{K}^+$  pumps/cotransporters  
145 or through interaction with functional groups (e.g. carbonyl) in  $\text{K}^+$  channels and pores in  
146 tight-junctions represents another potential source of K isotope fractionation that favors  
147  $^{39}\text{K}$  due to the lower energetic costs associated with the removal of the hydration shell  
148 from  $^{39}\text{K}$ . Molecular dynamic simulations indicate that kinetic isotope effects associated  
149 with desolvation ( $\epsilon_{\text{desolvation}}$ ) may be as large as  $\sim 2.5\%$  (14). However, the magnitude of  
150 this isotope effect will depend on extent to which desolvation is complete, the bonding

151 environment of the K<sup>+</sup>-coordinating ligands on the transporter (15), as well as whether  
152 the K<sup>+</sup> bound to the transporter subsequently isotopically equilibrates with the fluid  
153 through solvation-desolvation isotope exchange reactions. Although isotopic  
154 equilibration between bound and free K<sup>+</sup> may still be associated with isotopic  
155 fractionation, the magnitudes of these effects tend to be significantly smaller (e.g. <1‰)  
156 and controlled by bonding environment (e.g. anion charge and bond length; (10, 16,  
157 17)).

158         Given the potential for K isotope fractionation associated with desolvation and/or  
159 size selectivity and the mechanics of K<sup>+</sup>-transport by pumps, co-transporters, tight-  
160 junctions, and channels, we hypothesize that different classes of K<sup>+</sup> transporters will be  
161 associated with different K isotope effects. We propose that K<sup>+</sup> transport by channels  
162 and tight junctions will be associated with large K isotope effects favoring <sup>39</sup>K ( $\epsilon_{\text{channel or TJ}}$   
163 > 1‰) compared to K<sup>+</sup> transport by pumps and co-transporters ( $\epsilon_{\text{pump or co-transport}} \sim 0‰$ ). K<sup>+</sup>  
164 transport through channels and tight junctions is rapid (near the limit of diffusion; (18))  
165 and appears to involve either partial or full desolvation (19-21). In contrast, K<sup>+</sup> transport  
166 through pumps and co-transporters is relatively slow (per unit transporter, (13)), requires  
167 the simultaneous binding of multiple ions (e.g. 2 K<sup>+</sup> ions in the case of Na,K-ATPase),  
168 and is associated with mechanisms of self-correction that prevent the pump cycle from  
169 proceeding if incorrect ions bind to the ion pocket (22). These effects will tend to  
170 increase the amount of time K<sup>+</sup> is bound to the ion pocket before occlusion and may lead  
171 to partial or full equilibration of K isotopes between the ion pocket and the fluid. As  
172 equilibrium K isotope effects tend to be small (10, 16, 17), we speculate that K<sup>+</sup> transport  
173 by pumps and co-transporters are associated with less fractionation of K isotopes. In the  
174 following sections we show how our results for three biological systems are consistent  
175 with this hypothesis and speculate on ways in which K isotopes may provide new  
176 quantitative insights into K<sup>+</sup> transport and homeostasis in biological systems.

177

178 *Algae and Higher Plants.* As an essential macronutrient in all plants and the most  
179 abundant cation in the cytoplasm, K<sup>+</sup> contributes to electrical neutralization of anionic  
180 groups, membrane potential and osmoregulation, photosynthesis, and the movements of  
181 stomata (3, 23). K<sup>+</sup> transport across plant membranes is mediated by at least six major  
182 families of cation transport systems - 3 families of ion channels and 3 families of ion  
183 transporters. It is well-established that K<sup>+</sup> channels play prominent roles in K<sup>+</sup> uptake  
184 (24). For example, under normal growth conditions ( $[K^+]_{\text{ext}} \sim 1 \text{ mM}$ ; (25-27)) K<sup>+</sup> uptake in  
185 plants is dominated by transport via inward-rectifying K<sup>+</sup> channels electrically balanced  
186 by the ATP-driven efflux of H<sup>+</sup> (28, 29). In higher plants, K<sup>+</sup> channels have also been  
187 shown to be involved in translocation (root to stem), and recycling (leaf to root; 25).

188         Determining the K isotope effect associated with K<sup>+</sup> uptake by K<sup>+</sup>-channels in *C.*  
189 *reinhardtii* can be approximated by the difference in  $\delta^{41}\text{K}$  values between the whole cells  
190 and growth medium ( $\epsilon_{\text{in}} = \delta^{41}\text{K}_{\text{medium}} - \delta^{41}\text{K}_{\text{cell}} = \sim 1.2‰$ ; Figure 1). This result is similar

191 in sign, though somewhat larger in magnitude, than the K isotope effects estimated by  
192 Christensen, Qin, Brown and DePaolo (15) for K<sup>+</sup> transport in higher plants. Those  
193 authors analyzed the  $\delta^{41}\text{K}$  values of the roots, stems, and leaves of *Triticum aestivum*  
194 (wheat), *Glycine max* (soy) and *Oryza sativa* (rice) grown under hydroponic conditions  
195 and observed systematic differences in the  $\delta^{41}\text{K}$  value of the different reservoirs. In  
196 particular, roots, stems, and leaves exhibited increasingly negative  $\delta^{41}\text{K}$  values (Figure  
197 S1). Compared to the freshwater alga *C. reinhardtii*, quantifying transport-specific K  
198 isotope effects in higher plants is more complex as the  $\delta^{41}\text{K}$  value of each individual  
199 compartment (root, stem, leaf) reflects a balance between isotopic sources and sinks  
200 (e.g. the  $\delta^{41}\text{K}$  value of the root will depend on K isotope effects associated with both net  
201 K<sup>+</sup> uptake as well as translocation and recycling). Using a model of K isotope mass  
202 balance that includes assumptions regarding plant growth and the partitioning of K<sup>+</sup>  
203 fluxes between translocation and recycling, Christensen, Qin, Brown and DePaolo (15)  
204 estimated large K isotope effects for uptake ( $\epsilon_{\text{in}}$  ~-0.7 to 1.0‰) and translocation from  
205 root to stem (~0.6‰), but smaller isotopic effects (0 to 0.2‰) for translocation of K<sup>+</sup> from  
206 stem to leaf and recycling of K<sup>+</sup> from leaf to root.

207 Taken together, the results from algae and higher plants indicate that K<sup>+</sup> uptake  
208 in these systems – a process dominated K<sup>+</sup> channels – is associated with a large K  
209 isotope effect ( $\epsilon_{\text{in}}$  ~-0.7 to 1.2‰). The ~0.6‰ K isotope effect associated with  
210 translocation from root to stem is also consistent with transport by K<sup>+</sup> channels (30). In  
211 contrast, translocation and recycling of K<sup>+</sup> from leaf to root, a process that also involves  
212 K<sup>+</sup> channels (31, 32), does not appear to fractionate K isotopes. This could be due to the  
213 increased importance of other types of K<sup>+</sup> transporters in this process, a reduction in the  
214 expression of K isotope fractionation by channels associated with translocation due to  
215 rapid internal recycling of K<sup>+</sup> between stem and leaf (compared to K<sup>+</sup> transport from root  
216 to stem), or some combination of the two.

217

218 *Stenohaline and Euryhaline Marine Teleosts.* K<sup>+</sup> homeostasis in both euryhaline and  
219 stenohaline marine teleosts is linked to ionic and osmotic regulation. While K<sup>+</sup> sources  
220 include ingestion of seawater and diet (33), by far the largest K<sup>+</sup> source is transport  
221 across the gills (34), which are permeable to monovalent cations (Na<sup>+</sup>, K<sup>+</sup>) and anions  
222 (Cl<sup>-</sup>). Teleosts balance this salt intake by actively secreting Na<sup>+</sup>, K<sup>+</sup> and Cl<sup>-</sup> through  
223 mitochondria-rich cells (MRCs) of the gills and paracellularly through tight-junction  
224 proteins (occludins, claudins) in the gill epithelium (35). Specifically, Na<sup>+</sup>, K<sup>+</sup> and Cl<sup>-</sup>  
225 enter the MRC from the blood side via a basolateral Na<sup>+</sup>, K<sup>+</sup>, 2Cl<sup>-</sup> transporter (NKCC)  
226 driven by the inward directed Na<sup>+</sup> gradient created by basolateral Na,K-ATPase; Na<sup>+</sup> is  
227 recycled back to the blood via the Na,K-ATPase and secreted into seawater via “leaky”  
228 tight junction proteins (claudin 10; (36)); K<sup>+</sup> is either 1) secreted across the apical  
229 membrane into the seawater through ROMK channels or 2) recycled back to the blood  
230 via Kir channels while Cl<sup>-</sup> is secreted across the apical membrane via CFTR channels (5,

231 35). Both stenohaline and euryhaline marine teleosts possess this capability but  
232 euryhaline marine teleosts have evolved the ability to adapt this machinery to a wide  
233 range of water salinities by adjusting expression of NKCC, ROMK and tight junction  
234 claudins (5, 36-38).

235 In seawater adapted stenohaline and euryhaline marine teleosts,  $K^+$  homeostasis  
236 can be approximated as a balance between gain of  $K^+$  across tight-junctions in the gill  
237 epithelium and loss of  $K^+$  through apical ROMK channels in MRCs ((5); Fig. 2b). Other  
238 potential sources and sinks of  $K^+$  including the ingestion of seawater, diet, and excretion  
239 are either small compared to the fluxes of  $K^+$  across the gills (34) or transient in nature  
240 and unlikely to explain the systematic difference we observe between the  $\delta^{41}K_{\text{seawater}}$   
241 values of stenohaline and euryhaline teleosts. Furthermore, as most of the total  $K^+$   
242 content of teleosts resides in muscle tissue, the  $\delta^{41}K_{\text{seawater}}$  value of the muscle can be  
243 used as a reasonable approximation of the  $\delta^{41}K_{\text{seawater}}$  value of the whole organism (Fig.  
244 2b). At steady state, the  $\delta^{41}K_{\text{seawater}}$  value of the whole organism (equation 1 in Figure 2b)  
245 will reflect the balance between K isotope effects (if any) associated with  $K^+$  sources  
246 (paracellular transport across the gills) and  $K^+$  sinks (transcellular transport through  
247 ROMK channels in MRCs). Critically, the fractionation of K isotopes associated with  $K^+$   
248 sinks (transcellular  $K^+$  transport across MRCs) depends on the cycling of  $K^+$  within MRCs  
249 described above, in particular, the extent to which  $K^+$  transported into MRCs via the  
250 basolateral NKCC transporter and Na,K-ATPase is then secreted to seawater through  
251 ROMK channels or recycled back to the blood via Kir channels ( $f$  in Fig. 2C; where  $f =$   
252  $F_{\text{MRC-p}}/(F_{\text{MRC-out}}+F_{\text{MRC-p}})$ ). Combining the steady-state equation for whole organism K  
253 isotope mass-balance with a similar equation for the steady-state cycling of  $K^+$  in MRCs  
254 we can derive a simple model for  $K^+$  isotope mass balance for muscle tissue (equation 1  
255 in Figure 2c) that includes intake from seawater into plasma through tight-junction  
256 proteins (input), secretion from plasma to seawater across MRCs through Na,K-  
257 ATPase/NKCC and ROMK (output), as well as  $K^+$  recycling from MRCs back to plasma  
258 and exchange of  $K^+$  between muscle tissue and plasma.

259 Although the complexity of  $K^+$  homeostasis in marine teleosts does not permit the  
260 unique determination of K isotope effects associated with individual transport pathways  
261 (e.g. gain through pores in gill tight junctions or loss through apical ROMK channels), the  
262 model (equation 1) can be used to define an internally consistent set of K isotope effects  
263 that can be compared to the machinery of  $K^+$  homeostasis and the difference in  
264  $\delta^{41}K_{\text{seawater}}$  values between stenohaline and euryhaline teleosts. First, K appears to be at  
265 least partially desolvated during transport through pores in tight-junctions (19) and thus  
266 we expect a large K isotope effect associated with the source of  $K^+$  across the gill ( $\epsilon_{\text{gill}} >$   
267 1). Second, although we also expect a large K isotope effect associated with  $K^+$  loss  
268 through apical ROMK channels ( $\epsilon_{\text{MRC-out}} > 1$ ), the extent to which this isotope effect is  
269 expressed will depend on K isotope mass balance within MRC cells:  $K^+$  loss through  
270 ROMK channels will be associated with a small K isotope effect (stenohaline marine  
271 teleosts) if the recycling efficiency of  $K^+$  within MRCs ( $f$ ; where  $f = F_{\text{MRC-p}}/(F_{\text{MRC-out}}+F_{\text{MRC-p}})$ )

272  $\rho$ )) is low and K isotope effects associated with Na,K-ATPase are small ( $\epsilon_{p-MRC} \sim 0\text{‰}$ ).  
273 Conversely,  $K^+$  loss through ROMK channels will be associated with a large K isotope  
274 effect (euryhaline marine teleosts) if either the K isotope effect associated with transport  
275 of  $K^+$  into MRCs is larger (e.g.  $\epsilon_{p-MRC} \text{ euryhaline} > \epsilon_{p-MRC} \text{ stenohaline}$ ) or, as shown in  
276 Figure 2b, if the recycling efficiency of  $K^+$  within MRCs is higher (i.e.  $f \rightarrow 1$ ). In the latter  
277 case we can explain the full range of observed  $\delta^{41}K$  values in euryhaline and stenohaline  
278 marine teleosts using a single set of K isotope effects ( $\epsilon_{\text{channel or tight junction}} = 0.5 \text{ to } 2.5\text{‰}$   
279 and  $\epsilon_{\text{pump or co-transporter}} = \sim 0\text{‰}$ ).

280

281 *Terrestrial Mammals.*  $K^+$  homeostasis in terrestrial mammals reflects the balance  
282 between  $K^+$  gained from diet and  $K^+$  lost in urine and feces (Figure 3). This balance is  
283 largely achieved by the kidneys and colon, which possess a remarkable ability to sense  
284 a change in  $K^+$  in the diet and then appropriately adjust  $K^+$  loss in response. ECF (which  
285 includes blood plasma), the reservoir through which internal  $K^+$  is exchanged, represents  
286 2% of total body  $K^+$  and is also tightly regulated to maintain membrane potential as  
287 indicated by the narrow range of normal ECF  $[K^+]$  ( $\sim 3.5 - 5 \text{ mEq/L}$ )(8, 39). Of the  
288 remaining 98%, 75% of the  $K^+$  resides in muscle tissues ( $[K^+] \sim 130 \text{ mEq/L}$ ) and the  
289 remaining 23% in non-muscle tissues. Some tissues, particularly skeletal muscle, are  
290 critical to  $K^+$  homeostasis by providing a buffering reservoir of  $K^+$  that can take up  $K^+$   
291 after a meal and altruistically donate  $K^+$  to ECF to maintain blood plasma levels during  
292 fasting.

293

294 *External K isotope mass balance in terrestrial mammals.* Assuming that  $\sim 80\text{-}90\%$  of K in  
295 the diet is lost in urine (2) and that the progressive removal of  $K^+$  from the gut of *R.*  
296 *norvegicus* can be described by Rayleigh-type distillation of K isotopes,  $K^+$  uptake in the  
297 gut is associated with a K isotope effect ( $\epsilon_{g-p}$ ; Fig.4) of  $\sim 0.3 \pm 0.1\text{‰}$  (40). This K isotope  
298 effect leads to feces with a positive  $\delta^{41}K_{\text{diet}}$  value and urine with a slightly negative  $\delta^{41}K_{\text{diet}}$   
299 value (Figure 3).  $K^+$  uptake in the gut occurs largely transcellularly through tight-junction  
300 proteins in epithelial cells (e.g. claudin-15; (41)) and this transport mechanism likely  
301 contributes to the observed K isotope fractionation between diet and ECF (40; Fig. 3).  
302 However, while net transport of  $K^+$  in the gut is unidirectional (i.e. gut to plasma), other  
303 pathways of  $K^+$  cycling (e.g. paracellular secretion of  $K^+$  from ECF to gut (42)) may also  
304 contribute to the observed net K isotope effect ( $\epsilon_{gut}$ ). Relative to the diet, internal tissues  
305 exhibit a  $1\text{‰}$  range from  $-0.04\text{‰}$  for the cerebellum to  $+1.05\text{‰}$  for the heart (Fig. 3).  
306 Assuming an internal  $K^+$  distribution that is 75/15/10 muscle/adipose/other tissues, a  
307 reasonable average whole-body  $\delta^{41}K_{\text{diet}}$  value of *R. norvegicus* is  $\sim +0.5\text{‰}$ . As net uptake  
308 of  $K^+$  in the gut prefers  $^{39}K$ , the elevated average whole-body  $\delta^{41}K_{\text{diet}}$  of *R. norvegicus*  
309 requires that there be even greater K isotope fractionation (favoring  $^{39}K$ ) associated with  
310  $K^+$  loss in the urine (see below).



311

312 *Internal K isotope mass balance in terrestrial mammals.* As shown in Figures 4 and 5,  
313  $\delta^{41}\text{K}$  values of the 16 different tissues and fluids analyzed in *R. norvegicus* fall into 3  
314 distinct categories relative to their respective fluid reservoirs ( $\delta^{41}\text{K}_{\text{plasma}}$  or  $\delta^{41}\text{K}_{\text{CSF}}$ ). Type  
315 1 with positive  $\delta^{41}\text{K}_{\text{plasma/CSF}}$  values: red blood cells, heart, liver, soleus muscle and brain  
316 tissues; Type 2 with  $\delta^{41}\text{K}_{\text{plasma/CSF}}$  values that are close to 0: stomach, adipose tissue,  
317 kidney, gastrocnemius, EDL and TA muscles and Type 3 with negative  $\delta^{41}\text{K}_{\text{plasma/CSF}}$   
318 values: urine and CSF.

319 For all cases except urine, the  $\delta^{41}\text{K}$  values in Figures 4 and 5 can be interpreted  
320 as reflecting steady-state K isotope mass balance between the tissue/fluid and the  
321 relevant fluid reservoir (blood plasma/ECF or CSF) as the timescale for  $\text{K}^+$  turnover in  
322 these internal reservoirs is rapid (e.g. 0.9-10%/min; (43, 44)). At isotopic steady state,  
323 the  $\delta^{41}\text{K}$  value of  $\text{K}^+$  entering the reservoir will be equal to  $\delta^{41}\text{K}$  value of  $\text{K}^+$  leaving the  
324 reservoir. As a result, reservoirs with  $\delta^{41}\text{K}_{\text{plasma/CSF}}$  values that differ from 0‰ require that  
325 net  $\text{K}^+$  transport in one direction results in greater fractionation of K isotopes than net  $\text{K}^+$   
326 transport in the opposite direction. For example, reservoirs with positive  $\delta^{41}\text{K}_{\text{plasma}}$  values  
327 (Type 1) including red blood cells, heart, liver, and soleus require that  $\text{K}^+$  transport from  
328 ICF to plasma or ECF is associated with a larger K isotope effect than  $\text{K}^+$  transport from  
329 ECF to ICF (e.g.  $\varepsilon_{\text{t1-p}} \sim \varepsilon_{\text{p-t1}} + 0.17$  to  $0.55\text{‰}$ ; Fig. 4). The same relationship (Type 1) is  
330 observed between brain tissues and CSF (Fig. 5;  $\varepsilon_{\text{t1-CSF}} \sim \varepsilon_{\text{CSF-t1}} + 0.21$  to  $0.34\text{‰}$ ).  
331 Similarly, reservoirs with  $\delta^{41}\text{K}_{\text{plasma}}$  values that are close to 0‰ (Type 2) require that net  
332  $\text{K}^+$  transport in both directions does not fractionate K isotopes, i.e., the isotope effects  
333 must be of equal magnitude and sign and cancel at steady state (e.g.  $\varepsilon_{\text{t2-p}} \sim \varepsilon_{\text{p-t2}}$ ;  
334 Figure 4). These include kidney, adipose tissue, stomach, and gastrocnemius and TA  
335 muscles. Finally, the negative  $\delta^{41}\text{K}_{\text{plasma}}$  values for CSF (Type 3) requires that, at steady-  
336 state, net  $\text{K}^+$  transport from ECF to CSF through the choroid plexus and blood brain  
337 barrier (BBB) is characterized by a K isotope effect that is  $\sim 0.6\text{‰}$  greater than the K  
338 isotope effect associated  $\text{K}^+$  transport from CSF to ECF (Figure 5).

339 Linking the observed net K isotope effects associated with different internal  
340 reservoirs (e.g. Type 1-3) to the machinery of  $\text{K}^+$  homeostasis (channels, pumps, co-  
341 transporters, and proteins in tight-junctions) in *R. norvegicus* is complicated by the  
342 existence of a host of transporters capable of bidirectional  $\text{K}^+$  transport between ECF  
343 and ICF. Although much is known about the identity, molecular structure, and  
344 mechanisms of various transporters, quantitative information on how each transporter  
345 contributes to the gross fluxes of  $\text{K}^+$  between internal reservoirs and ECF at steady state  
346 is lacking. Of the internal reservoirs studied here, the machinery that regulates K  
347 homeostasis in red blood cells (Type 1; +  $\delta^{41}\text{K}_{\text{plasma}}$  values) is perhaps the best  
348 understood due to its fundamental role in the regulation of red blood cell volume (45). In  
349 red blood cells, elevated intercellular  $\text{K}^+$  is maintained by a ‘pump-leak’ mechanism

350 where the pump is Na,K-ATP<sub>ase</sub> (with minor contributions from co-transporters such as  
351 NKCC;(46, 47)), and the leak is passive transport through K<sup>+</sup> channels (48). When  
352 considered in the context of the measured  $\delta^{41}\text{K}_{\text{plasma}}$  values of RBC this mechanism is  
353 consistent with K isotope fractionation associated with K transport in channels that is at  
354 least 0.4‰ greater than K isotope fractionation associated with K transport in pumps  
355 (Na,K-ATP<sub>ase</sub>) and co-transporters.

356 Extrapolating this result to internal reservoirs where the machinery of K<sup>+</sup>  
357 homeostasis is more complex and less understood due, in part, to the presence of  
358 multiple cell types with distinct functions and internal K<sup>+</sup> cycling, we speculate that all  
359 Type 1 reservoirs (red blood cells, heart, liver, and soleus muscle) are broadly  
360 characterized by a similar ‘pump-leak’ mechanism with greater fractionation of K  
361 isotopes during K<sup>+</sup> transport from ICF to ECF via channels than K transport from ECF to  
362 ICF via pumps and co-transporters. Measured  $\delta^{41}\text{K}_{\text{plasma}}$  values of Type 1 reservoirs are  
363 not uniform, however, and the observed variability, from +0.55 ±0.15‰ in heart tissue to  
364 +0.17 ±0.03‰ for soleus muscle, likely reflects real differences in 1) K isotope effects  
365 associated with transport of K from ICF to ECF (e.g. due to channel-specific K isotope  
366 effects or transport of K from ICF to ECF via co-transporters) and/or 2) K isotope effects  
367 associated with transport from ECF to ICF (e.g. due to pump/co-transporter-specific K  
368 isotope effects or transport of K from ECF to ICF via channels).

369 Along similar lines we interpret Type 2 reservoirs (EDL, gastrocnemius, and TA  
370 muscles, adipose tissue, stomach, and kidney) as cases where any K isotope effects  
371 associated with transport from ICF to ECF cancel those associated with transport from  
372 ECF to ICF. This could be achieved in a number of different ways; an increased role for  
373 pumps/co-transporters for K<sup>+</sup> transport from ICF to ECF or an increased role for  
374 channels in K<sup>+</sup> transport from ECF to ICF. For example, there is evidence that the strong  
375 inward rectifier K<sup>+</sup> channel (Kir2.1) is involved in K<sup>+</sup> influx in skeletal muscle (49). Isotope  
376 effects associated with K<sup>+</sup> influx through these K<sup>+</sup> channels may offset some of the  
377 isotope effect of K<sup>+</sup> channels involved in K<sup>+</sup> efflux.

378 Both Type 3 reservoirs, urine and CSF, are associated with complex pathways  
379 of K<sup>+</sup> exchange along the nephron (urine, Fig. 4) and across the blood-brain-barrier and  
380 the choroid plexus (CSF, Figure 5) and are considered separately. K<sup>+</sup> in CSF reflects a  
381 balance between paracellular and transcellular K<sup>+</sup> transport across endothelial cells at  
382 the blood-brain-barrier (BBB) and paracellular K<sup>+</sup> transport of across epithelial cells of  
383 the choroid plexus (49). Gross fluxes of K<sup>+</sup> into the brain across the BBB are 4x larger  
384 than those associated with the choroid plexus (50), suggesting that the observed net K  
385 isotope effects may be largely due to fractionation associated with transport across the  
386 BBB. However, K<sup>+</sup> transport from ECF to CSF through the choroid plexus is thought to  
387 occur by paracellular routes through pores in tight junctions (Fig. 5), a process that we  
388 expect to fractionate K isotopes and thus may contribute to the observed negative  
389  $\delta^{41}\text{K}_{\text{plasma}}$  values for CSF. With regards to K<sup>+</sup> transport across the BBB, both paracellular  
390 (through tight-junction pores) and transcellular (through BBB endothelial cells) routes

391 may be important (49). Again, we expect paracellular  $K^+$  transport through tight junction  
392 pores to be associated with a larger K isotope effect whereas any K isotope effects  
393 associated with transcellular transport will depend on the internal cycling of  $K^+$  (and  
394 associated isotope effects) within endothelial BBB cells (pumps, (51); co-transporters,  
395 (52); and channels, (53)). Overall, the observation of large K isotope fractionation  
396 associated with the transport of  $K^+$  from plasma to CSF (Fig. 5;  $\epsilon_{p-CSF} = 0.59 \pm 0.12\%$ )  
397 requires that either 1) there is a large K isotope effect associated with transcellular  $K^+$   
398 transport across endothelial BBB cells or 2) transport of  $K^+$  from plasma to CSF is  
399 dominated by paracellular routes in both the choroid plexus and across the BBB.

400 Unlike the internal  $K^+$  reservoirs discussed above, all of which are interpreted as  
401 independent homeostatic systems at steady state with an external fluid (e.g. plasma or  
402 CSF), the loss of  $K^+$  through the urine represents the end product of a series of steps  
403 each of which can contribute to the net K isotope effect (e.g. Figure 4;  $\epsilon_{p-u} \sim 0.50\%$ ).  
404 These are 1) glomerular filtration, 2) reabsorption along the proximal tubule and the thick  
405 ascending limb of the loop of Henle, and 3) secretion and reabsorption by principal and  
406 intercalated collecting duct cells. Although a detailed description of the potential K  
407 isotope effects associated with each step is beyond the scope of this manuscript, a brief  
408 description follows. Glomerular filtration is not expected to fractionate K isotopes as the  
409 slit diaphragms freely filter ions and small molecules. A large fraction (~85%) of the  
410 filtered K is subsequently reabsorbed in the proximal tubule and thick ascending limb.  
411 The residual  $K^+$  is passed along to the collecting ducts where  $K^+$  is added prior to  
412 excretion as urine. The addition of  $K^+$  in the collecting ducts occurs transcellularly, via  
413 ROMK channels in principal cells and BK channels in intercalated cells (8). However,  
414 although we expect  $K^+$  channels to be associated with a large K isotope effect ( $\epsilon_{channel} >$   
415  $1\%$ ), a negative  $\delta^{41}K_{plasma}$  value for  $K^+$  secreted from collecting duct cells is not an  
416 obvious result; the extent to which any isotopic fractionation associated with these  
417 channels is expressed depends on internal  $K^+$  cycling within the principal and  
418 intercalated cells in a manner that is analogous to MRCs in marine teleost gills (54).

419

420 *Ideas and Speculation:* The results presented here demonstrate that  $K^+$  homeostasis in  
421 biological systems is associated with systematic variability in  $^{41}K/^{39}K$  ratios and strongly  
422 suggests that K transport through channels and tight-junction proteins is associated with  
423 greater fractionation of K isotopes than transport via pumps and co-transporters.  
424 However, with the exception of *C. Reinhardtii* where the observed isotopic difference  
425 between media and the whole cell can be attributed to a single transport mechanism, our  
426 results do not directly constrain the magnitude of the individual K isotope effects  
427 associated with the machinery of K transport. Quantifying machinery-specific K isotope  
428 effects through a combination of laboratory and numerical approaches (14) is therefore a  
429 high-priority for future research. Identification of machinery-specific K isotope effects will  
430 lead to improvements in our understanding of the underlying mechanisms of  $K^+$  transport

431 (and selectively) and may permit the quantification of the K<sup>+</sup> transporters involved in K  
432 homeostasis *in situ*.

#### 433 4. Materials and Methods

434 *C. reinhardtii* cultures: The CMJ030 wild type strain was obtained from the  
435 Chlamydomonas culture collection [www.chlamycollection.org](http://www.chlamycollection.org). Tris Phosphate (TP)  
436 medium was prepared according to: Gorman, D.S., and R.P. Levine (1965) Proc. Natl.  
437 Acad. Sci. USA 54, 1665-1669. The culture at an initial density of 0.5 x10<sup>5</sup> cells mL<sup>-1</sup> was  
438 grown in TP under continuous illumination (100 μmol photons m<sup>-2</sup> s<sup>-1</sup>) and shaking for  
439 four days. Samples (in triplicate) containing 2 x10<sup>7</sup> cells (~800 mg) were harvested and  
440 washed twice in 5 mM HEPES and 2 mM EDTA before collection and air-drying of the  
441 cell pellet. Pelletized cells (~30mg) were digested in screw-capped teflon vials on a hot  
442 plate at elevated temperatures (~75 °C) using a 5:2 mixture of HNO<sub>3</sub> (68-70 vol.%) and  
443 H<sub>2</sub>O<sub>2</sub> (30 vol.%).  
444

445 *Euryhaline and stenohaline marine teleosts*: Samples of teleost muscle tissue were  
446 sourced from fish markets (Nassau Seafood and Trader Joe's in Princeton, NJ and the  
447 Fulton Fish Market in Brooklyn, NY) and research cruises (NOAA NEFSC Bottom Trawl  
448 Survey, Fall 2015 and Spring 2015). All teleosts were caught in seawater which has a  
449 uniform δ<sup>41</sup>K value of +0.12‰ relative to SRM3141a (55). Samples of white dorsal  
450 muscle (100 to 3000 mg) were digested on a hot plate at elevated temperatures (~75  
451 °C) or in a high-pressure microwave system (MARS 6) using HNO<sub>3</sub> (68-70 vol.%) H<sub>2</sub>O<sub>2</sub>  
452 (30 vol.%) in a ratio of 5:2 until complete. Major/minor element analyses for digested  
453 samples were carried out at Princeton University using a quadrupole inductively coupled  
454 plasma mass spectrometer (Thermo Scientific iCap Q). Concentrations and elemental  
455 ratios were determined using externally calibrated standards and average uncertainties  
456 (element/element) are ~10%.

457 *R. norvegicus* experiments: All rat experiments were approved by the Institutional Animal  
458 Care and Use Committees of the University of Southern California. Two series were  
459 conducted. Series #1: Male Wistar rats (n=3, 250-275g body weight, Envigo,  
460 Indianapolis, IN) were housed in a climate controlled (22-24°C) environment with a 12  
461 hr: 12hr light/dark cycle, and fed casein based normal K<sup>+</sup> diet TD.08267 (Envigo,  
462 Indianapolis, IN) and water ad libitum for 11 days. At day 8, rats were placed overnight  
463 into metabolic cages (Techniplast, Buguggiate, Italy) with food and water ad libitum for  
464 16-hour collection of urine and feces. On termination day (1:30-3:30PM), rats were  
465 anesthetized with an intramuscular (IM) injection of ketamine (80 mg/kg, Phoenix  
466 Pharmaceuticals, St. Joseph, MO) and xylazine (8 mg/kg, Lloyd Laboratories,  
467 Shenandoah, IA) in a 1:1 ratio. Through a midline incision, the liver, kidneys, heart, fat  
468 pads, and stomach (flushed of contents) were removed; blood was collected via cardiac  
469 puncture, spun down to separate plasma from RBCs. Then gastrocnemius, soleus, TA,  
470 and EDL skeletal muscles were dissected. All tissues were washed in ice-cold TBS to  
471 remove excess blood, weighed and snap frozen in liquid nitrogen. Series #2: Male  
472 Sprague Dawley rats (n=4, 250-300g, Envigo, Indianapolis, IN) were housed in a climate  
473 controlled (22-24°C) environment with a 12 hr: 12hr light/dark cycle and fed grain-based  
474 vivarium chow (LabDiet 5001, labdiet.com). CSF extraction procedures are as reported

475 previously (56). In brief, Rats were deeply anesthetized using a cocktail of ketamine  
476 90mg/kg, xylazine, 2.8 mg/kg, and acepromazine 0.72 mg/kg by intramuscular injection.  
477 A needle was lowered to below the caudal end of the occipital skull and the syringe  
478 plunger pulled back slowly, allowing the clear CSF to flow into the syringe. After  
479 extracting ~100-200  $\mu$ l of CSF, the needle was raised quickly (to prevent suction of  
480 blood while coming out of the cisterna magna) and the CSF dispensed into a microfuge  
481 tube and immediately frozen in dry ice and then stored at -80 °C until time of analysis.  
482 Following CSF extraction and decapitation, whole brains with 10-15mm spinal cord  
483 extension were rapidly removed and immediately flash frozen and stored in -80°C until  
484 dissection into spinal cord, cerebrum, and cerebellum for subsequent digestion and K  
485 isotopic analysis.

486 *Ion chromatography and isotope ratio mass-spectrometry:* K was purified for isotopic  
487 analyses using an automated high-pressure ion chromatography (IC) system. The IC  
488 methods utilized here followed those previously described in (10, 11). The accuracy of  
489 our chromatographic methods was verified by purifying and analyzing external standards  
490 (SRM3141a and SRM70b) alongside unknown samples. Purified aliquots of K were  
491 analyzed in 2% HNO<sub>3</sub> for their isotopic compositions on a Thermo Scientific Neptune  
492 Plus multi-collector inductively coupled plasma mass spectrometer (MC-ICP-MS) at  
493 Princeton University, using previously published methods (11, 55). The external  
494 reproducibility of our protocols (chromatography and mass spectrometry) was  
495 determined through replicate measurements of international standards. Measured  
496 values of SRM70b, reported relative to SRM3141 ( $\delta^{41}\text{K}_{\text{SRM3141}}$ ) are  $-0.57 \pm 0.17\%$  ( $2\sigma$ ; N  
497 = 59), indistinguishable from published values (10, 12, 55). For samples analyzed once  
498 (chromatography and mass spectrometry), reported errors are the  $2\sigma$  uncertainties of  
499 the external standard. In cases where samples were analyzed multiple times, reported  
500 errors in are twice the standard error of the mean (2 S.E. or 95% confidence).

501

## 502 Acknowledgments

503

504 Cornelia Spetea acknowledges the sabbatical program at the Faculty of Science,  
505 University of Gothenburg, and thanks Martin C. Jonikas for the *Chlamydomonas*  
506 experiments performed in his laboratory at Princeton University. John Higgins, Alicia  
507 McDonough, and Jang Youn thank the University Kidney Research Organization  
508 (UKRO) for financial support.

509

## 510 References

- 511 1. A. A. McDonough, J. H. Youn, Potassium Homeostasis: The Knowns, the  
512 Unknowns, and the Health Benefits. *Physiology* **32**, 100-111 (2017).  
513 2. R. Agarwal, R. Afzalpurkar, J. S. Fordtran, Pathophysiology of potassium  
514 absorption and secretion by the human intestine. *Gastroenterology* **107**, 548-571  
515 (1994).  
516 3. M. Gierth, P. Mäser, Potassium transporters in plants—involvement in K+  
517 acquisition, redistribution and homeostasis. *FEBS letters* **581**, 2348-2356 (2007).

- 518 4. J. H. Youn, A. A. McDonough, Recent advances in understanding integrative  
519 control of potassium homeostasis. *Annual review of physiology* **71**, 381-401  
520 (2009).
- 521 5. F. Furukawa, S. Watanabe, S. Kimura, T. Kaneko, Potassium excretion through  
522 ROMK potassium channel expressed in gill mitochondrion-rich cells of  
523 Mozambique tilapia. *American Journal of Physiology-Regulatory, Integrative and*  
524 *Comparative Physiology* **302**, R568-R576 (2012).
- 525 6. J. Stautz *et al.*, Molecular Mechanisms for Bacterial Potassium Homeostasis.  
526 *Journal of Molecular Biology* **433** (2021).
- 527 7. M. L. Gumz, L. Rabinowitz, C. S. Wingo, An Integrated View of Potassium  
528 Homeostasis. *N Engl J Med* **373**, 60-72 (2015).
- 529 8. A. A. McDonough, J. H. Youn, Potassium Homeostasis: The Knowns, the  
530 Unknowns, and the Health Benefits. *Physiology (Bethesda)* **32**, 100-111 (2017).
- 531 9. M. Greenlee, C. S. Wingo, A. A. McDonough, J. H. Youn, B. C. Kone, Narrative  
532 review: evolving concepts in potassium homeostasis and hypokalemia. *Annals of*  
533 *internal medicine* **150**, 619-625 (2009).
- 534 10. D. P. S. Ramos, L. E. Morgan, N. S. Lloyd, J. A. Higgins, Reverse weathering in  
535 marine sediments and the geochemical cycle of potassium in seawater: Insights  
536 from the K isotopic composition (K-41/K-39) of deep-sea pore-fluids. *Geochimica*  
537 *Et Cosmochimica Acta* **236**, 99-120 (2018).
- 538 11. L. E. Morgan *et al.*, High-precision K-41/K-39 measurements by MC-ICP-MS  
539 indicate terrestrial variability of delta K-41. *Journal of Analytical Atomic*  
540 *Spectrometry* **33**, 175-186 (2018).
- 541 12. K. Wang, S. B. Jacobsen, An estimate of the Bulk Silicate Earth potassium  
542 isotopic composition based on MC-ICPMS measurements of basalts.  
543 *Geochimica Et Cosmochimica Acta* **178**, 223-232 (2016).
- 544 13. B. Roux, Ion channels and ion selectivity. *Essays in biochemistry* **61**, 201-209  
545 (2017).
- 546 14. A. E. Hofmann, I. C. Bourg, D. J. DePaolo, Ion desolvation as a mechanism for  
547 kinetic isotope fractionation in aqueous systems. *Proceedings of the National*  
548 *Academy of Sciences* **109**, 18689-18694 (2012).
- 549 15. J. N. Christensen, L. Qin, S. T. Brown, D. J. DePaolo, Potassium and calcium  
550 isotopic fractionation by plants (soybean [Glycine max], rice [Oryza sativa], and  
551 wheat [Triticum aestivum]). *ACS Earth and Space Chemistry* **2**, 745-752 (2018).
- 552 16. W. Li, K. D. Kwon, S. Li, B. L. Beard, Potassium isotope fractionation between K-  
553 salts and saturated aqueous solutions at room temperature: Laboratory  
554 experiments and theoretical calculations. *Geochimica et Cosmochimica Acta*  
555 **214**, 1-13 (2017).
- 556 17. H. Zeng *et al.*, Ab Initio Calculation of Equilibrium Isotopic Fractionations of  
557 Potassium and Rubidium in Minerals and Water. *Acs Earth and Space Chemistry*  
558 **3**, 2601-2612 (2019).
- 559 18. B. Hille, *Ion channels of excitable membranes* (Sinauer, Sunderland, Mass.,  
560 2001).
- 561 19. H. Yu, S. Y. Noskov, B. Roux, Two mechanisms of ion selectivity in protein  
562 binding sites. *Proceedings of the National Academy of Sciences* **107**, 20329-  
563 20334 (2010).
- 564 20. W. Kopec *et al.*, Direct knock-on of desolvated ions governs strict ion selectivity  
565 in K<sup>+</sup> channels. *Nature chemistry* **10**, 813-820 (2018).

- 566 21. S. Berneche, B. Roux, A microscopic view of ion conduction through the K<sup>+</sup>  
567 channel. *Proceedings of the National Academy of Sciences of the United States*  
568 *of America* **100**, 8644-8648 (2003).
- 569 22. H. Rui, P. Artigas, B. Roux, The selectivity of the Na<sup>+</sup>/K<sup>+</sup>-pump is controlled by  
570 binding site protonation and self-correcting occlusion. *Elife* **5**, e16616 (2016).
- 571 23. J. Marchand, P. Heydarizadeh, B. Schoefs, C. Spetea, "Chloroplast Ion and  
572 Metabolite Transport in Algae" in *Photosynthesis in Algae: Biochemical and*  
573 *Physiological Mechanisms*, A. W. D. Larkum, A. R. Grossman, J. A. Raven, Eds.  
574 (Springer International Publishing, Cham, 2020), 10.1007/978-3-030-33397-3\_6,  
575 pp. 107-139.
- 576 24. A. Lebaudy, A.-A. Véry, H. Sentenac, K<sup>+</sup> channel activity in plants: genes,  
577 regulations and functions. *FEBS letters* **581**, 2357-2366 (2007).
- 578 25. B. Malhotra, A. D. Glass, Potassium fluxes in *Chlamydomonas reinhardtii* (I.  
579 Kinetics and electrical potentials). *Plant physiology* **108**, 1527-1536 (1995).
- 580 26. E. Epstein, D. Rains, O. Elzam, Resolution of dual mechanisms of potassium  
581 absorption by barley roots. *Proceedings of the National Academy of Sciences of*  
582 *the United States of America* **49**, 684 (1963).
- 583 27. L. V. Kochian, W. J. Lucas, Potassium transport in corn roots: I. Resolution of  
584 kinetics into a saturable and linear component. *Plant Physiology* **70**, 1723-1731  
585 (1982).
- 586 28. R. E. Hirsch, B. D. Lewis, E. P. Spalding, M. R. Sussman, A role for the AKT1  
587 potassium channel in plant nutrition. *Science* **280**, 918-921 (1998).
- 588 29. D. T. Britto, H. J. Kronzucker, Cellular mechanisms of potassium transport in  
589 plants. *Physiologia Plantarum* **133**, 637-650 (2008).
- 590 30. F. Gaymard *et al.*, Identification and disruption of a plant shaker-like outward  
591 channel involved in K<sup>+</sup> release into the xylem sap. *Cell* **94**, 647-655 (1998).
- 592 31. B. Lacombe *et al.*, A shaker-like K<sup>+</sup> channel with weak rectification is expressed  
593 in both source and sink phloem tissues of *Arabidopsis*. *The Plant Cell* **12**, 837-  
594 851 (2000).
- 595 32. G. Pilot *et al.*, Guard cell inward K<sup>+</sup> channel activity in *Arabidopsis* involves  
596 expression of the twin channel subunits KAT1 and KAT2. *Journal of Biological*  
597 *Chemistry* **276**, 3215-3221 (2001).
- 598 33. C. P. Hickman Jr, Ingestion, intestinal absorption, and elimination of seawater  
599 and salts in the southern flounder, *Paralichthys lethostigma*. *Canadian journal of*  
600 *zoology* **46**, 457-466 (1968).
- 601 34. J. Maetz, Seawater teleosts - evidence for a sodium-potassium exchange in  
602 branchial sodium-excreting pump. *Science* **166**, 613-& (1969).
- 603 35. D. H. Evans, P. M. Piermarini, K. P. Choe, The multifunctional fish gill: dominant  
604 site of gas exchange, osmoregulation, acid-base regulation, and excretion of  
605 nitrogenous waste. *Physiological reviews* **85**, 97-177 (2005).
- 606 36. D. Kolosov, P. Bui, H. Chasiotis, S. P. Kelly, Claudins in teleost fishes. *Tissue*  
607 *barriers* **1**, e25391 (2013).
- 608 37. F. Furukawa, S. Watanabe, K. Kakumura, J. Hiroi, T. Kaneko, Gene expression  
609 and cellular localization of ROMKs in the gills and kidney of Mozambique tilapia  
610 acclimated to fresh water with high potassium concentration. *American Journal of*  
611 *Physiology-Regulatory, Integrative and Comparative Physiology* **307**, R1303-  
612 R1312 (2014).
- 613 38. F. Furukawa *et al.*, In vivo and in vitro effects of high-K<sup>+</sup> stress on branchial  
614 expression of ROMKa in seawater-acclimated Mozambique tilapia. *Comparative*

- 615 *Biochemistry and Physiology Part A: Molecular & Integrative Physiology* **187**,  
616 111-118 (2015).
- 617 39. W. F. Boron, Boulpaep, E.L., *Medical Physiology* (Elsevier Saunders,  
618 Philadelphia, Pennsylvania, 2005).
- 619 40. Rayleigh distillation refers to the process by which isotopes are distilled during  
620 fractionation removal (in this case uptake of K<sup>+</sup> through the gut endothelium).  
621 Assuming K<sup>+</sup> is continually removed from the system and this removal is  
622 associated with constant isotopic fractionation (a), the K isotopic composition of  
623 the residual (feces) is described by  $^{41}\text{K}/^{39}\text{K}_{\text{feces}} / ^{41}\text{K}/^{39}\text{K}_{\text{diet}} = f^{(a-1)}$  where  $^{41}\text{K}/^{39}\text{K}_{\text{diet}}$   
624 is the ratio of K isotopes in the diet,  $^{41}\text{K}/^{39}\text{K}_{\text{feces}}$  is the ratio of K isotopes in the  
625 feces, f is the fraction of K removed from the diet (80-90%), and a is the net K  
626 isotopic fractionation associated with uptake.
- 627 41. V. Garcia-Hernandez, M. Quiros, A. Nusrat, Intestinal epithelial claudins:  
628 expression and regulation in homeostasis and inflammation. *Ann. N.Y. Acad. Sci.*  
629 **1397**, 66-79 (2017).
- 630 42. M. C. Rao, "Physiology of Electrolyte Transport in the Gut: Implications for  
631 Disease" in *Comprehensive Physiology*. <https://doi.org/10.1002/cphy.c180011>,  
632 pp. 947-1023.
- 633 43. C. Terner, L. Eggleston, H. Krebs, The role of glutamic acid in the transport of  
634 potassium in brain and retina. *Biochemical Journal* **47**, 139 (1950).
- 635 44. A. W. Jones, P. D. Sander, D. L. Kampschmidt, The effect of norepinephrine on  
636 aortic <sup>42</sup>K turnover during deoxycorticosterone acetate hypertension and  
637 antihypertensive therapy in the rat. *Circulation research* **41**, 256-260 (1977).
- 638 45. D. C. Tosteson, J. F. Hoffman, Regulation of cell volume by active cation  
639 transport in high and low potassium sheep red cells. *Journal of General*  
640 *Physiology* **44**, 169-194 (1960).
- 641 46. J. R. Sachs, Ouabain-insensitive sodium movements in human red blood cell.  
642 *Journal of General Physiology* **57**, 259-& (1971).
- 643 47. J. Duhm, Furosemide-sensitive K<sup>+</sup> (Rb<sup>+</sup>) transport in human-erythrocytes -  
644 modes of operation, dependence on extracellular and intracellular Na<sup>+</sup>, kinetics,  
645 pH dependency, and the effect of cell-volume and N-ethylmaleimide. *J. Membr.*  
646 *Biol.* **98**, 15-32 (1987).
- 647 48. G. Gardos, The function of calcium in the potassium permeability of human  
648 erythrocytes. *Biochimica et biophysica acta* **30**, 653-654 (1958).
- 649 49. S. B. Hladky, M. A. Barrand, Fluid and ion transfer across the blood-brain and  
650 blood-cerebrospinal fluid barriers; a comparative account of mechanisms and  
651 roles. *Fluids and Barriers of the CNS* **13**, 1-69 (2016).
- 652 50. R. Katzman, L. Graziani, R. Kaplan, A. Escriva, Exchange of cerebrospinal fluid  
653 potassium with blood and brain: study in normal and ouabain perfused cats.  
654 *Archives of neurology* **13**, 513-524 (1965).
- 655 51. A. L. Betz, J. A. Firth, G. W. Goldstein, Polarity of the blood-brain barrier:  
656 distribution of enzymes between the luminal and antiluminal membranes of brain  
657 capillary endothelial cells. *Brain research* **192**, 17-28 (1980).
- 658 52. S. Foroutan, J. Brillault, B. Forbush, M. E. O'Donnell, Moderate-to-severe  
659 ischemic conditions increase activity and phosphorylation of the cerebral  
660 microvascular endothelial cell Na<sup>+</sup>-K<sup>+</sup>-Cl<sup>-</sup> cotransporter. *American Journal of*  
661 *Physiology-Cell Physiology* **289**, C1492-C1501 (2005).
- 662 53. C. Van Renterghem, P. Vigne, C. Frelin, A charybdotoxin-sensitive,  
663 Ca<sup>2+</sup>-activated K<sup>+</sup> channel with inward rectifying properties in brain



- 664 microvascular endothelial cells: properties and activation by endothelins. *Journal*  
665 *of neurochemistry* **65**, 1274-1281 (1995).
- 666 54. In order to generate a negative  $d^{41}K_{\text{plasma}}$  value through K isotopic fractionation  
667 associated with apical  $K^+$  channels, 1) the rate of  $K^+$  recycling across the  
668 basolateral membrane of collecting duct cells must be much higher than the rate  
669 of  $K^+$  secretion and 2) the K isotope effect associated with the apical  $K^+$  channels  
670 must be larger the K isotope effect associated with inward recycling of  $K^+$  from  
671 collecting duct cells to plasma.
- 672 55. D. P. S. Ramos, L. A. Coogan, J. G. Murphy, J. A. Higgins, Low-temperature  
673 oceanic crust alteration and the isotopic budgets of potassium and magnesium in  
674 seawater. *Earth and Planetary Science Letters* **541**, 11 (2020).
- 675 56. E. E. Noble *et al.*, Control of Feeding Behavior by Cerebral Ventricular Volume  
676 Transmission of Melanin-Concentrating Hormone. *Cell Metab* **28**, 55-68 e57  
677 (2018).  
678

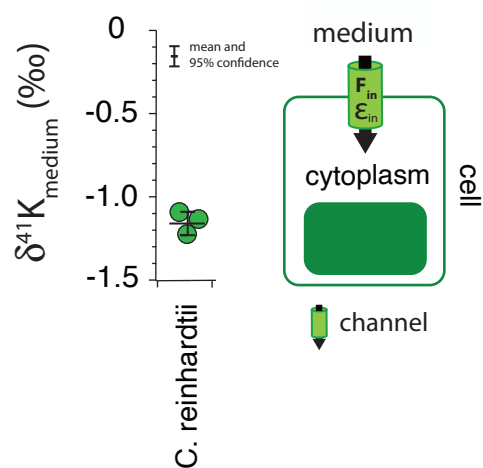

**Figure 1.** The difference in  $\delta^{41}\text{K}$  values between external and intracellular  $\text{K}^+$  in growth experiments of *C. reinhardtii* and a diagram of  $\text{K}^+$  transport in single-celled algae grown under optimal conditions (See Methods) including major fluxes ( $F_{\text{in}}$ ), transport machinery, and K isotope effects ( $\epsilon_{\text{in}}$ ).  $P = 4.5 \times 10^{-5}$  by one-way ANOVA in Matlab.

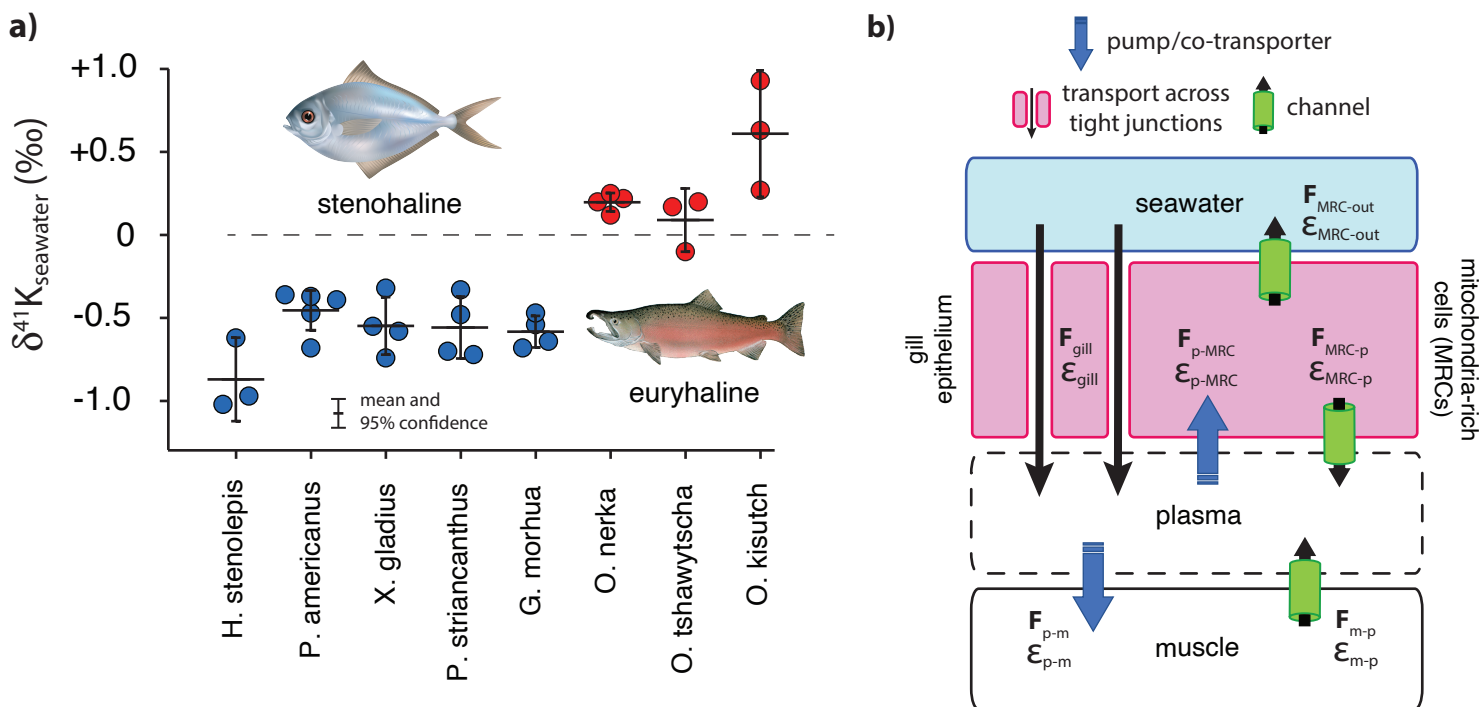

**Figure 2. a)** The difference in  $\delta^{41}\text{K}$  values between seawater and dorsal white muscle of various stenohaline and euryhaline marine teleosts. Muscle  $[\text{K}^+]$  and  $\delta^{41}\text{K}_{\text{seawater}}$  values are listed in Table S1.  $P = 1.4 \times 10^{-10}$  for the difference in  $\delta^{41}\text{K}_{\text{seawater}}$  value between stenohaline and euryhaline teleosts. **b)** A schematic of K isotope mass balance in a marine teleost including fluxes ( $F$ 's) and isotope effects ( $\epsilon$ 's).  $\text{K}^+$  is supplied across the gill epithelium via transport across tight-junctions and lost from mitochondrial rich cells (MRCs) through channels ( $F_{\text{MRC-out}}$ ).  $\text{K}^+$  cycling within MRCs reflects a balance between  $\text{K}^+$  supplied across the basolateral membrane ( $F_{\text{p-MRC}}$ ) and  $\text{K}^+$  lost to seawater ( $F_{\text{MRC-out}}$ ) and  $\text{K}^+$  recycled back across the basolateral membrane through channels ( $F_{\text{MRC-p}}$ ). **c)** At steady-state,  $F_{\text{gill}} = F_{\text{MRC-out}}$ ,  $F_{\text{p-MRC}} = F_{\text{gill}} + F_{\text{MRC-p}}$ ,  $F_{\text{p-m}} = F_{\text{m-p}}$  and K isotope mass balance for teleost muscle tissue can be simplified to equation (1). One possible explanation for the elevated  $\delta^{41}\text{K}_{\text{seawater}}$  values of marine euryhaline teleosts is greater recycling of K across the basolateral membrane ( $f \rightarrow 1$ ).

$$\text{c) } \delta^{41}\text{K}_{\text{seawater}}^{\text{muscle}} (\text{‰}) = \epsilon_{\text{p-MRC}} - \epsilon_{\text{gill}} + f(\epsilon_{\text{MRC-out}} - \epsilon_{\text{MRC-p}}) \quad (1)$$

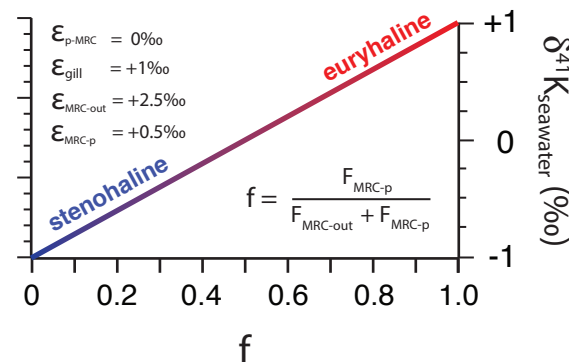

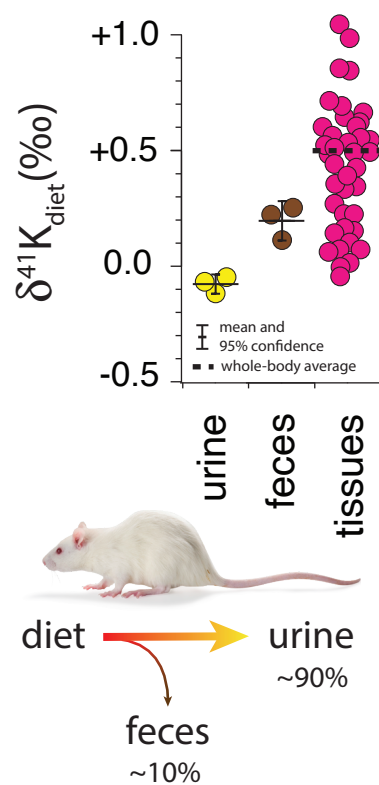

**Figure 3.** Whole-body K isotope mass balance in *R. norvegicus* on a controlled diet. Measured  $\delta^{41}K$  values of urine ( $P = 0.19$ ) and feces ( $P = 0.037$ ) relative to diet indicate a preferential uptake of  $^{39}K$  in the gut. The total range in  $\delta^{41}K_{\text{diet}}$  values in the tissues of *R. norvegicus* is  $\sim 1\text{‰}$  with an estimated whole-body average  $\delta^{41}K_{\text{diet}}$  value of approx.  $+0.5\text{‰}$ , consistent with preferential loss of  $^{39}K$  in urine.

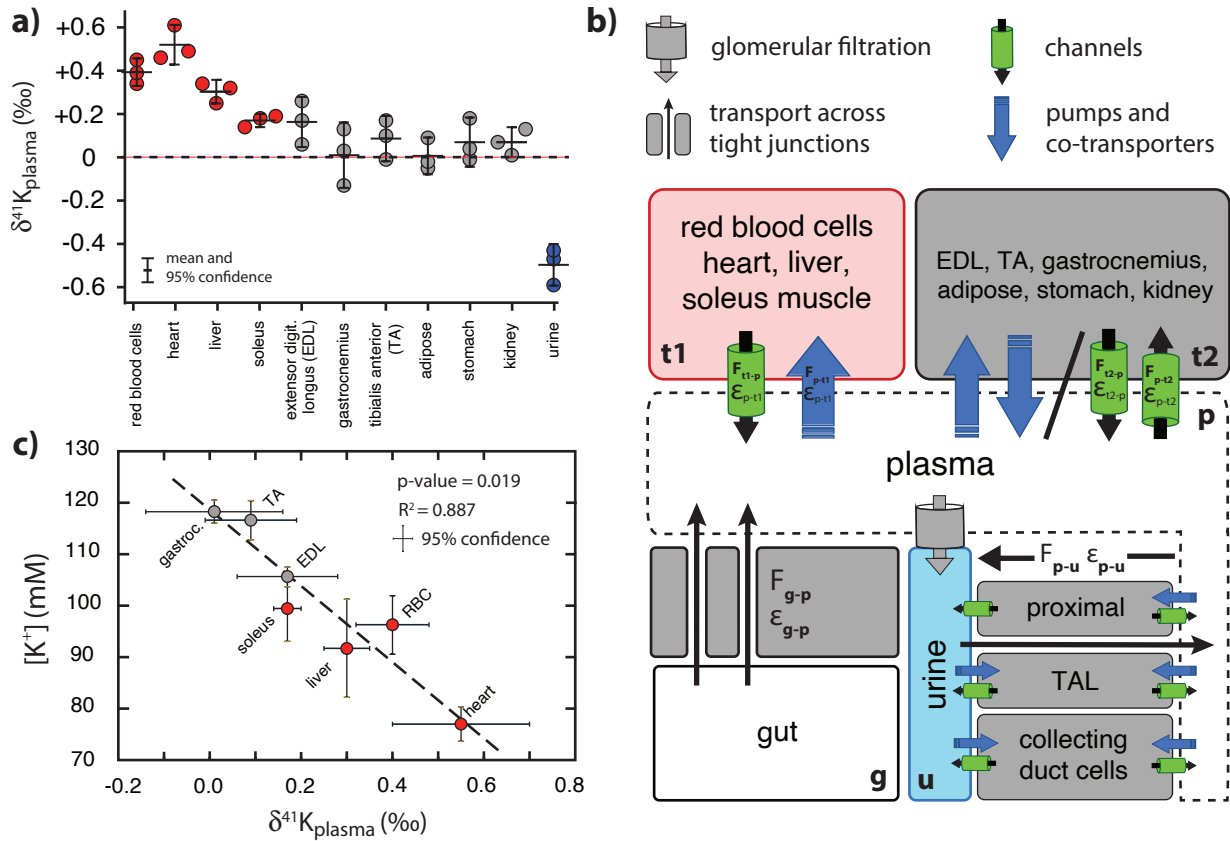

**Figure 4. a)** K isotopic composition of tissues/fluids *R. norvegicus* normalized to blood plasma ( $\delta^{41}K_{\text{plasma}} = 0\text{‰}$ ) together with **b)** a diagram of K mass-balance including transport by (1)  $K^+$  channels, (2)  $K^+$ -pumps/co-transporters, (3) pores in tight-junctions, and (4) glomerular filtration. **c)** A plot of  $[K^+]$  and  $\delta^{41}K_{\text{plasma}}$  values for a subset of the tissues in *r. norvegicus* showing that tissues with lower  $[K^+]$  tend to be associated with higher  $\delta^{41}K_{\text{plasma}}$  values.  $\delta^{41}K_{\text{plasma}}$  values that are positive (●) indicate that net  $K^+$  transport out of the tissue/cell/fluid is enriched in  $^{39}K$  relative to  $K^+$  transport into the tissue/cell/fluid.  $\delta^{41}K_{\text{plasma}}$  values that are indistinguishable from 0‰ (○) indicate that the K isotope effects associated with  $K^+$  transport into and out of the cell/tissue/fluid are either 0 or equal in magnitude (and thus cancel).  $\delta^{41}K_{\text{plasma}}$  values that are negative (●) indicate that net  $K^+$  transport into the cell/tissue/fluid is enriched in  $^{39}K$  relative to  $K^+$  transport out of the cell/tissue/fluid. The net isotopic fractionation associated with  $K^+$  loss in urine ( $\epsilon_{p-u}$ ) reflects the flux-weighted average of the K isotopic effects associated with both re-absorption and secretion of  $K^+$  in the proximal tubule, the thick ascending limb (TAL), and cells in the collecting ducts of the kidney.

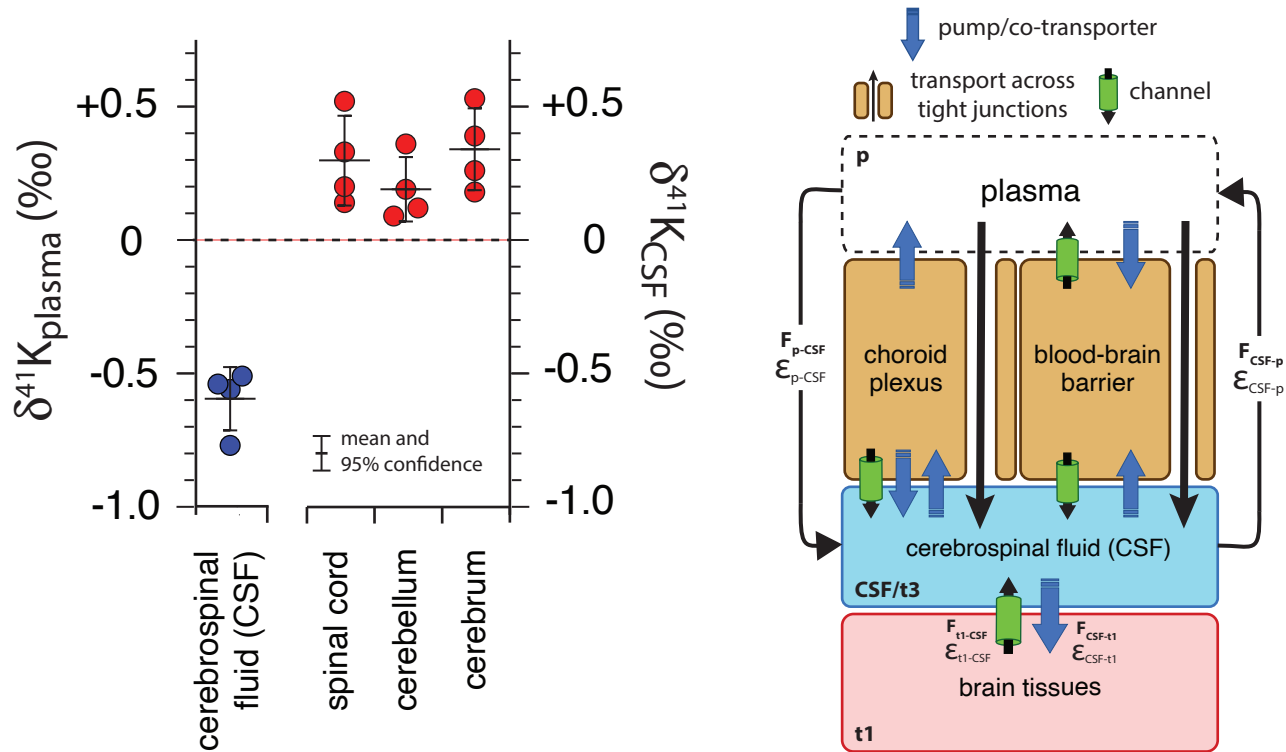

**Figure 5.** Potassium isotopic composition of cerebrospinalfluid from *r. norvegicus* raised on a controlled diet normalized to blood plasma ( $\delta^{41}\text{K}_{\text{plasma}} = 0\text{‰}$ ) and brain tissues normalized to cerebrospinal fluid ( $\delta^{41}\text{K}_{\text{CSF}} = 0\text{‰}$ ) together with a diagram of K mass-balance across the choroid plexus and blood brain barrier (BBB) including transport by (1) K-channels, (2) K-pumps/co-transporters, and (3) through tight junctions. K fluxes are associated with net isotope effects ( $\epsilon$ 's).  $\delta^{41}\text{K}_{\text{CSF}}$  values that are positive (●) indicate that net K transport out of brain tissues (spinal cord, cerebellum, and cerebrum) and into CSF is enriched in  $^{39}\text{K}$  relative to K transport from CSF into these tissues (e.g.  $\epsilon_{\text{t1-CSF}} - \epsilon_{\text{CSF-t1}} > 0$ ). The negative  $\delta^{41}\text{K}_{\text{plasma}}$  values (●) for CSF indicate that net K transport into CSF from blood plasma is enriched in  $^{39}\text{K}$  relative to K transport from CSF to blood plasma (e.g.  $\epsilon_{\text{p-CSF}} - \epsilon_{\text{CSF-p}} > 0$ ) and reflects the flux-weighted average of the transporters that dominate K exchange across both the choroid plexus and BBB.
